# Supplementary material for: Pilot Study of Cytoprotective Mechanisms of Selenium Nanorods (SeNrs) under Ischemia-like Conditions on Cortical Astrocytes
Source: MDPI journal article supplement (doi:10.3390/ijms241512217), 2023-07-30
Supplement: s1 [file s1]

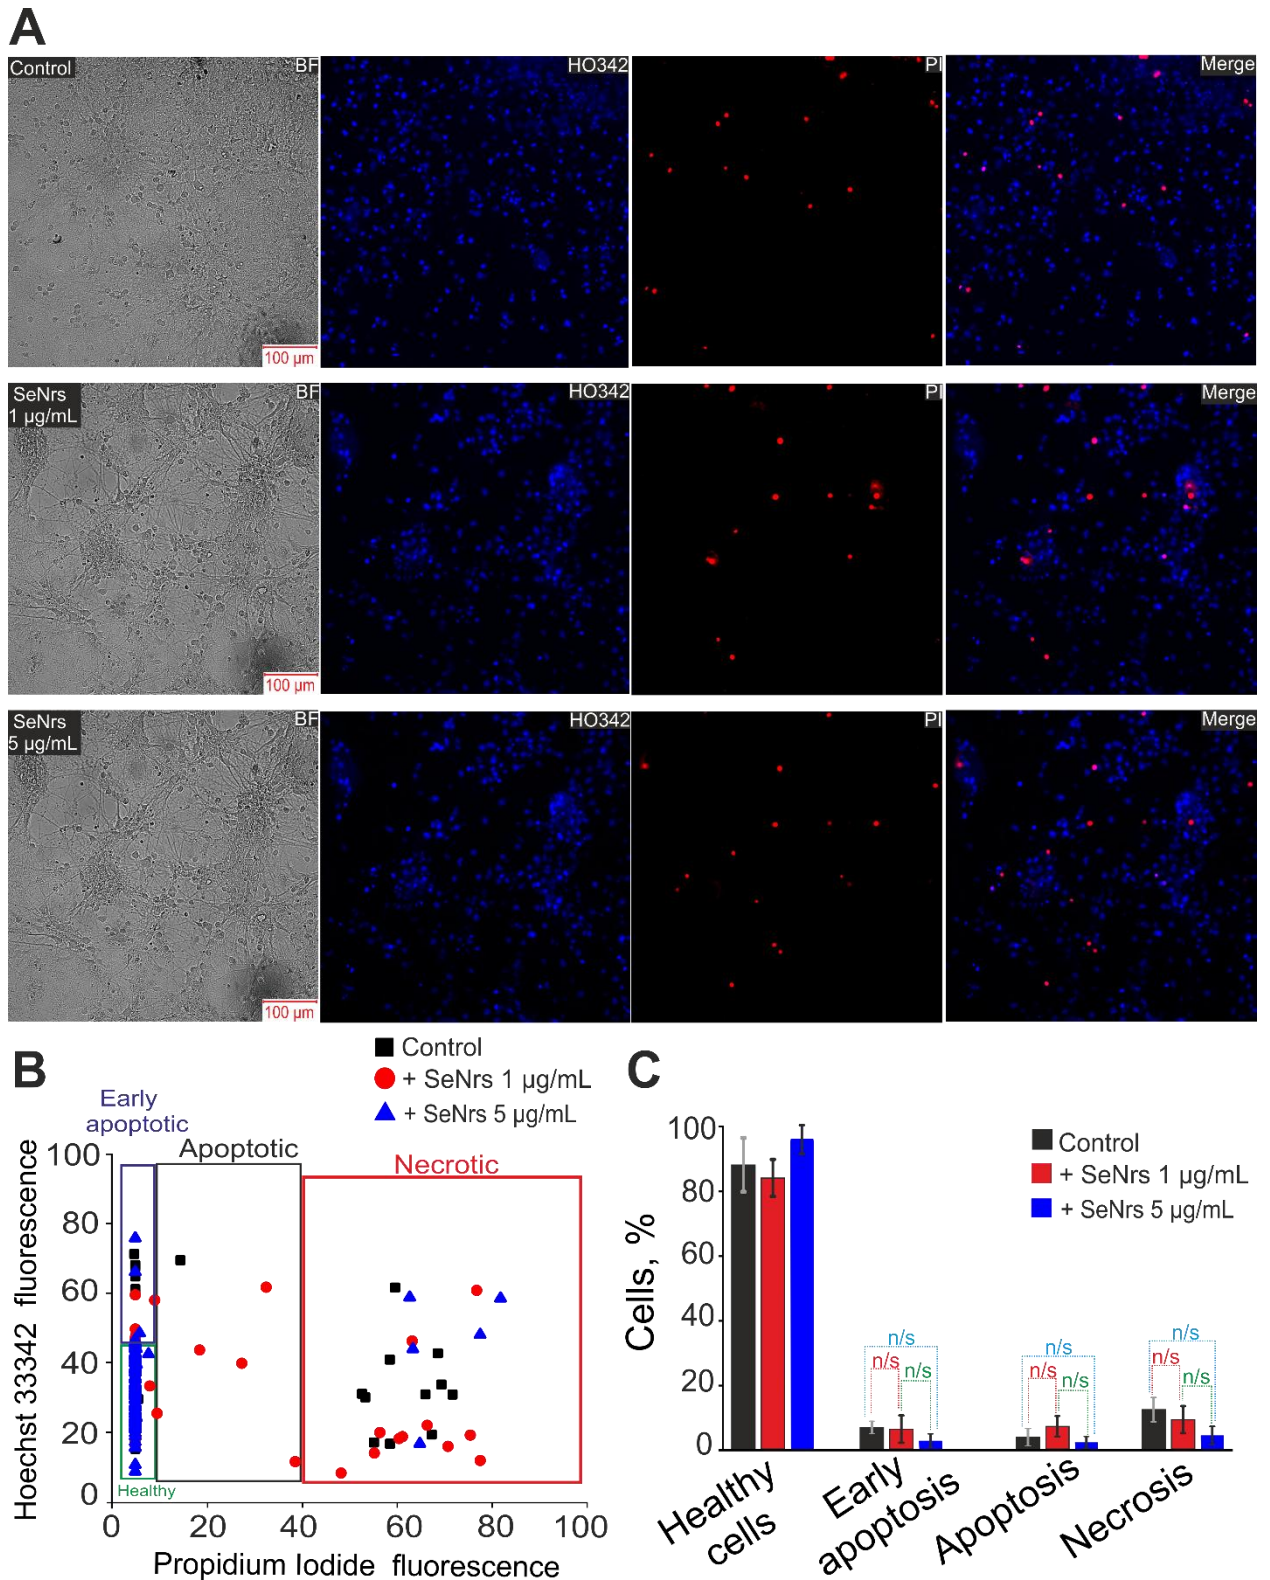

**SUPPLEMENTARY, FIGURE S1.** The effect of 24-hour preincubation of cortical astrocytes with 1 or 5  $\mu\text{g/mL}$  of selenium nanorods (SeNrs) on the induction of necrosis and apoptosis. (A) – Double staining of cells with Hoechst 33342 (HO342), Propidium iodide (PI), merge HO342 with PI and bright-field microscopy (BF). Control – cells without SeNrs. (B) – Cytochrome demonstrating the viability of cortical astrocytes in Control (without SeNrs) and after 24-h preincubation with 1 or 5  $\mu\text{g/mL}$  SeNrs. X-axis – the intensity of PI fluorescence; Y-axis – the intensity of Hoechst 33342 fluorescence. Cells were stained with the probes 24 hours after the application of SeNrs. (C) – Effect

of 24 hours preincubation with 1 or 5  $\mu\text{g/mL}$  SeNrs on the induction of necrosis and apoptosis. N cell cultures = 5; n cover slips with cells for each sample = 5. Preincubation of cells with the SeNrs does not cause reliable cell death (n/s – data not significant,  $p > 0.05$ ).

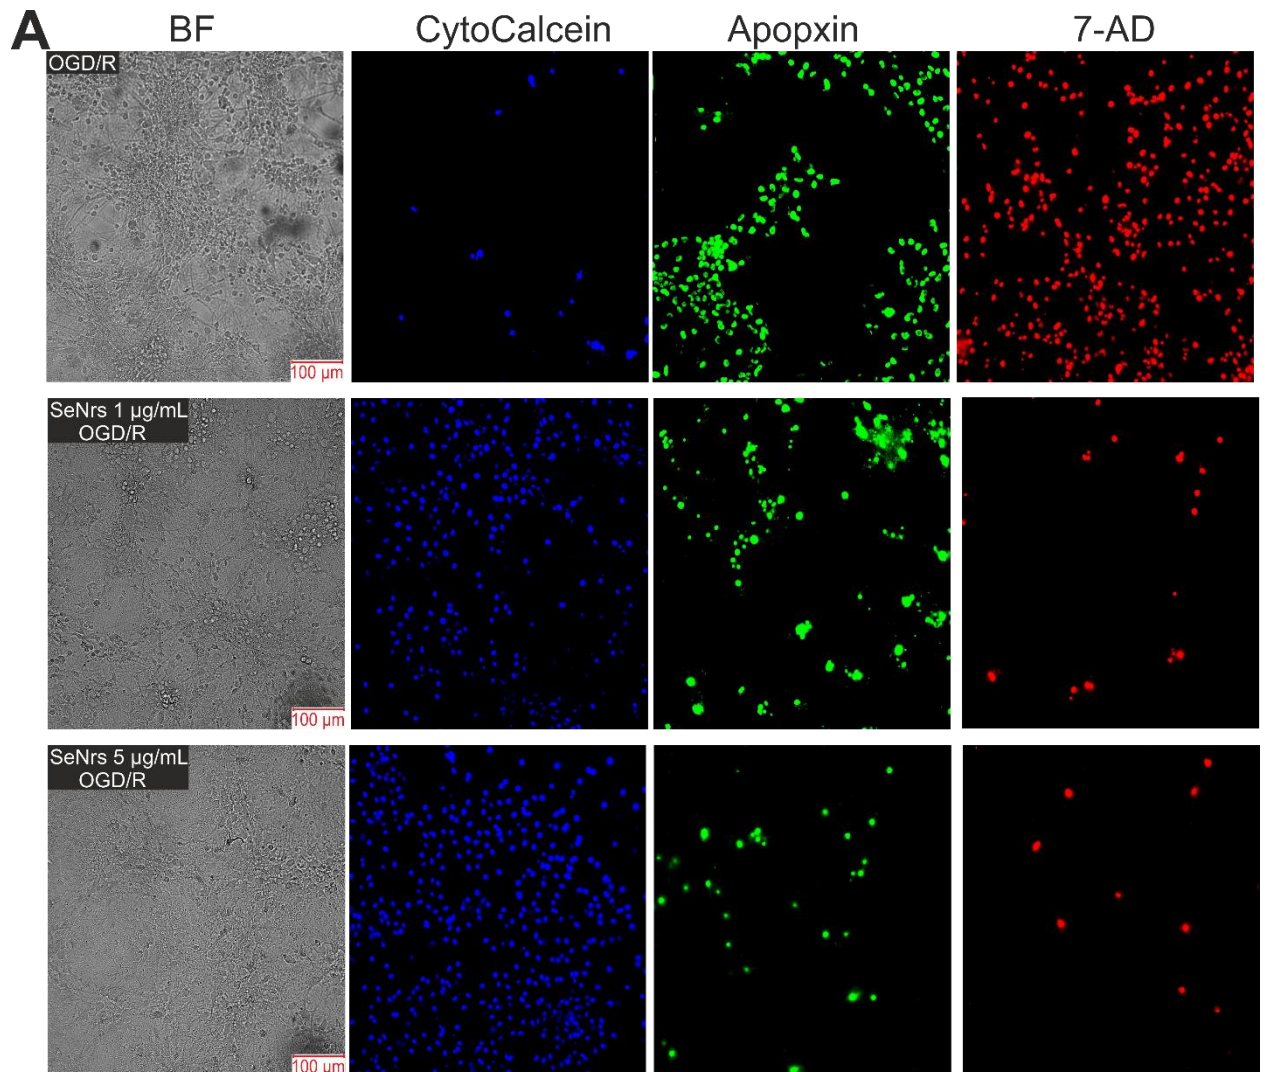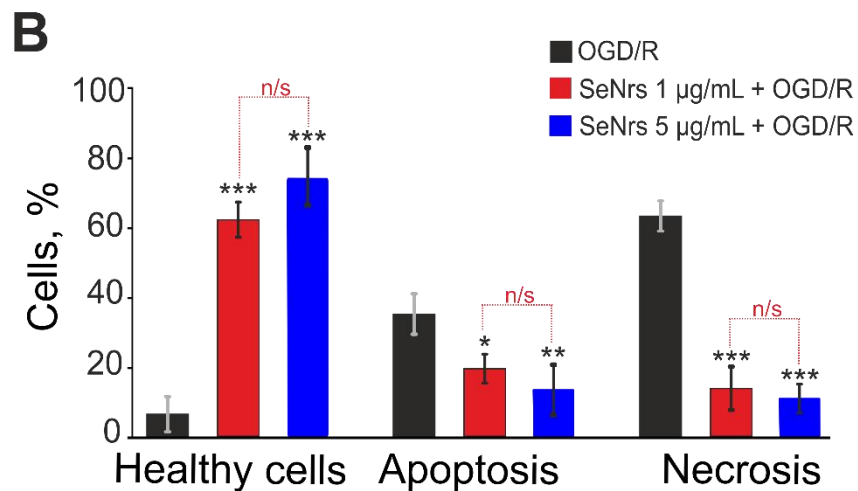

**SUPPLEMENTARY, FIGURE S2.** Effect of 24-h incubation of cortical astrocytes with 1  $\mu\text{g/mL}$  or 5  $\mu\text{g/mL}$  of SeNrs and OGD/R on the induction of necrosis and apoptosis after 24 h OGD/R. **(A)** – Cell staining using the Apoptosis/Necrosis Detection Kit assay. BF – bright-field microscopy, CytoCalcein – healthy cells indicator, Apopxin – apoptotic cells indicator and 7-AD (7-aminoactinomycin D) – necrotic cells indicator. **(B)** – Healthy cells and cells with apoptosis or necrosis after incubation with 1  $\mu\text{g/mL}$  or 5  $\mu\text{g/mL}$  of SeNrs and OGD/R. Each value is the mean  $\pm$  SE ( $n \geq 3$ ). Black asterisks represent comparison of experimental groups versus OGD/R-group. Comparison of experimental groups with control: n/s – data not significant ( $p > 0.05$ ), \*  $p < 0.05$ , \*\*  $p < 0.01$ , and \*\*\*  $p < 0.001$ . Comparison of experimental groups with each other is indicated in red.
